# Supplementary material for: Effects of Evolocumab on the ApoA1 Remnant Ratio: A Pooled Analysis of Phase 3 Studies
Source: Springer Nature journal article supplement (doi:10.1007/s40119-019-0133-6), 2019-03-09
Supplement: MOESM1 [file 16536132]

**SUPPLEMENTARY MATERIAL**

**Table S1** Change from baseline to week 12 in key lipid parameters by week 12 apoA1 remnant ratio threshold and evolocumab dose/dose frequency

| Change<br>from baseline in<br>parameter | Evolocumab dose/dose frequency        |                               |                                 |                                |                                 |                                |
|-----------------------------------------|---------------------------------------|-------------------------------|---------------------------------|--------------------------------|---------------------------------|--------------------------------|
|                                         | 140 mg Q2W<br>( <i>n</i> = 48)        | 420 mg QM<br>( <i>n</i> = 53) | 140 mg Q2W<br>( <i>n</i> = 174) | 420 mg QM<br>( <i>n</i> = 177) | 140 mg Q2W<br>( <i>n</i> = 519) | 420 mg QM<br>( <i>n</i> = 518) |
|                                         | Week 12 apoA1 remnant ratio threshold |                               |                                 |                                |                                 |                                |
|                                         | < 3.6                                 |                               | 3.6–6.0                         |                                | > 6.0                           |                                |
| LDL-C (mg/dl),<br>mean (SE)             | -79.3 (4.4)                           | -67.5 (8.0)                   | -77.2 (2.8)                     | -70.1 (3.0)                    | -71.6 (1.3)                     | -70.6 (1.3)                    |
| <i>p</i> value <sup>a</sup>             |                                       |                               | <b>0.0412</b>                   |                                |                                 | 0.9454                         |
| HDL-C (mg/dl),<br>mean (SE)             | 0.8 (1.1)                             | 0.04 (1.5)                    | 2.7 (0.6)                       | 1.9 (0.5)                      | 3.9 (0.4)                       | 3.5 (0.3)                      |
| <i>p</i> value <sup>a</sup>             |                                       |                               | <b>0.0152</b>                   |                                |                                 | <b>0.0004</b>                  |
| Non-HDL-C<br>(mg/dl), mean (SE)         | -89.1 (4.6)                           | -76.1 (8.4)                   | -84.7 (2.9)                     | -76.2 (3.2)                    | -77.0 (1.4)                     | -75.6 (1.3)                    |
| <i>p</i> value <sup>a</sup>             |                                       |                               | <b>0.0033</b>                   |                                |                                 | 0.6645                         |

|                                   |               |               |               |              |               |               |
|-----------------------------------|---------------|---------------|---------------|--------------|---------------|---------------|
| <b>VLDL-C (mg/dl),</b>            | 2.25          | 1.0           | -3.0          | -2           | -3.0          | -3.0          |
| <b>median (Q1, Q3)</b>            | (-10.0, 9.5)  | (-12.0, 3.0)  | (-9.0, 3.0)   | (-8.0, 4.0)  | (-7.0, 0.5)   | (-7.0, 0.5)   |
| <b><i>p</i> value<sup>a</sup></b> |               |               | <b>0.012</b>  |              | <b>0.0413</b> |               |
| <b>Lp(a) (nmol/l),</b>            | -11           | -12           | -9            | -7           | -10           | -8            |
| <b>median (Q1, Q3)</b>            | (-24.0, -1.0) | (-28.0, -1.0) | (-25.0, -2.0) | (-21.0, 0.0) | (-25.0, -1.0) | (-26.0, -1.0) |
| <b><i>p</i> value<sup>a</sup></b> |               | 0.9879        |               |              | 0.4653        |               |
| <b>ApoA1 (mg/dl),</b>             |               |               |               |              |               |               |
| <b>mean (SE)</b>                  | 9.2 (2.8)     | 6.2 (3.6)     | 10.0 (1.3)    | 6.8 (1.4)    | 8.7 (0.8)     | 8.5 (0.8)     |
| <b><i>p</i> value<sup>a</sup></b> |               | 0.6156        |               |              | 0.5423        |               |
| <b>ApoB (mg/dl),</b>              |               |               |               |              |               |               |
| <b>mean (SE)</b>                  | -55.0 (2.6)   | -46.2 (4.5)   | -51.5 (1.7)   | -45.4 (1.8)  | -46.3 (0.9)   | -44.7 (0.8)   |
| <b><i>p</i> value<sup>a</sup></b> |               | <b>0.0004</b> |               |              | 0.5677        |               |

---

*n* number of subjects in the full analysis set, *ApoA1* apolipoprotein A1, *ApoA1 remnant ratio* apoA1/(non-HDL-C - LDL-C), *HDL-C* high-density lipoprotein cholesterol, *LDL-C* low-density lipoprotein cholesterol, *Lp(a)* lipoprotein(a), *Q2W* every 2 weeks, *QM* monthly, *SE* standard error, *VLDL-C* very low-density lipoprotein cholesterol

<sup>a</sup>*p* values are for 3-way comparison by dosing frequency group. Values < 0.05 are in bold text

No clear pattern in these results was identified by treatment group or achieved apoA1 remnant ratio
